# Supplementary material for: Metabolic Obesity Phenotypes and Their Transitions as Determinants of Multimorbidity Trajectories: Evidence from Global Aging Cohorts
Source: Research Square preprint supplement (doi:10.21203/rs.3.rs-6138718/v1), 2025-05-12
Supplement: Supplementary file 1 [file 8fa0ab01d822ca51e6836270.docx]

STROBE Statement—Checklist of items that should be included in reports

**Ite m**

**No Recommendation**

**Title and abstract**

1

1. Indicate the study’s design with a commonly used term in the title or the abstract
2. Provide in the abstract an informative and balanced summary of what

was done and what was found

1

5

**Page No**

**Introduction**

| Background/rational  e | 2 | Explain the scientific background and rationale for the investigation being  reported | 7 |
| --- | --- | --- | --- |
| Objectives | 3 | State specific objectives, including any prespecified hypotheses | 8 |

**Methods**

| Study design | 4 | Present key elements of study design early in the paper | 8 |
| --- | --- | --- | --- |
| Setting | 5 | Describe the setting, locations, and relevant dates, including periods of  recruitment, exposure, follow-up, and data collection | 8 and supplementar y material |
| Participants | 6 | 1. Give the eligibility criteria, and the sources and methods of selection of participants. Describe methods of follow-up 2. For matched studies, give matching criteria and number of exposed   and unexposed | 8 and supplementar y material  NA |
| Variables | 7 | Clearly define all outcomes, exposures, predictors, potential confounders, and effect modifiers. Give diagnostic criteria, if applicable | 9-10 and supplementar y material |
| Data sources/ measurement | 8* | For each variable of interest, give sources of data and details of methods of assessment (measurement). Describe comparability of assessment  methods if there is more than one group | 19 and supplementar y material |
| Bias | 9 | Describe any efforts to address potential sources of bias | 9-11, 18 |
| Study size | 10 | Explain how the study size was arrived at | NA |
| Quantitative variables | 11 | Explain how quantitative variables were handled in the analyses. If applicable, describe which groupings were chosen and why | 9-10 and supplementar y material |
| Statistical methods | 12 | 1. Describe all statistical methods, including those used to control for confounding 2. Describe any methods used to examine subgroups and interactions 3. Explain how missing data were addressed 4. If applicable, explain how loss to follow-up was addressed 5. Describe any sensitivity analyses | 10-11  11  11 NA 11 |
| **Results** | |  |
| Participants | 13* | 1. Report numbers of individuals at each stage of study—eg numbers potentially eligible, examined for eligibility, confirmed eligible, included in the study, completing follow-up, and analysed 2. Give reasons for non-participation at each stage 3. Consider use of a flow diagram | 12 and Table 1  NA supplementary material |
| Descriptive data | 14* | 1. Give characteristics of study participants (eg demographic, clinical, social) and information on exposures and potential confounders 2. Indicate number of participants with missing data for each variable of interest 3. Summarise follow-up time (eg, average and total amount) | 12 and Table 1 supplementary material  supplementary material |
| Outcome data | 15* | Report numbers of outcome events or summary measures over time | 12-13 and Figure-1 |

| Main results | 16 | (*a*) Give unadjusted estimates and, if applicable, confounder-adjusted estimates and their precision (eg, 95% confidence interval). Make  clear which confounders were adjusted for and why they were | 12-15 ,Table 2 and supplementary material |
| --- | --- | --- | --- |
|  |  | included |  |
|  |  | (*b*) Report category boundaries when continuous variables were categorized | Table 2 and supplementary material |
|  |  | (*c*) If relevant, consider translating estimates of relative risk into |  |
|  |  | absolute risk for a meaningful time period | NA |
| Other analyses | 17 | Report other analyses done—eg analyses of subgroups and  interactions, and sensitivity analyses | 12-15 and Supplementar y material |

**Discussion**

| Key results | 18 | Summarise key results with reference to study objectives | 15-16 |
| --- | --- | --- | --- |
| Limitations | 19 | Discuss limitations of the study, taking into account sources of potential bias or imprecision. Discuss both direction and magnitude  of any potential bias | 18 |
| Interpretation | 20 | Give a cautious overall interpretation of results considering objectives, limitations, multiplicity of analyses, results from similar  studies, and other relevant evidence | 16-18 |
| Generalisability | 21 | Discuss the generalisability (external validity) of the study results | NA |

**Other information**

| Funding 22 Give the source of funding and the role of the funders for the present  study and, if applicable, for the original study on which the present article is based | 6 |
| --- | --- |

*Give information separately for exposed and unexposed groups.

**Note:** An Explanation and Elaboration article discusses each checklist item and gives methodological background and published examples of transparent reporting. The STROBE checklist is best used in conjunction with this article (freely available on the Web sites of PLoS Medicine at [http://www.plosmedicine.org/,](http://www.plosmedicine.org/) Annals of Internal Medicine at [http://www.annals.org/,](http://www.annals.org/) and Epidemiology at [http://www.epidem.com/).](http://www.epidem.com/)) Information on the STROBE Initiative is available at [http://www.strobe-statement.org.](http://www.strobe-statement.org/)
